# Supplementary material for: Haplotype assembly in polyploid genomes and identical by descent shared tracts
Source: PubMed Central journal article supplement — Bioinformatics. 2013 Jun 19;29(13):i352–60. doi: 10.1093/bioinformatics/btt213 (PMC3694639; doi:10.1093/bioinformatics/btt213), 2013-06-19
Supplement: supp_btt213_Aguiar.348.sup.1.pdf [file supp_btt213_Aguiar.348.sup.1.pdf]

## Appendix

### 1 Proof of Lemma 2

**Proof 1** Let  $\{(f_1, f_2), (f_2, f_3), \dots, (f_{k-1}, f_k), (f_k, f_1)\}$  be the edges of a simple cycle  $c_s$  in  $G_F$  of length  $k$  fragments (vertices). We can partition the fragments into two sets such that each set corresponds to the haplotypes of the individual. If  $k$  is even, then we can partition the even fragments  $(f_2, \dots, f_k)$  and odd fragments  $(f_1, \dots, f_{k-1})$  into two sets such that each set does not contain internal fragment conflicts. Likewise, if  $k$  is odd, then no such partition exists because  $f_k$  conflicts with  $f_1$  and  $f_{k-1}$ . The function that takes a cycle in  $G_C$  and computes the number of  $\frac{01}{10}$  (negative) edges is denoted  $\text{neg}()$ . We claim that for  $k$  even,  $\text{neg}(c_s)$  is even and for  $k$  odd  $\text{neg}(c_s)$  is odd. For this proof we consider any length  $k - 1$  subset of vertices in  $c$  and without loss of generality we assume this subset is  $v_1, \dots, v_{k-1}$ . Consider any two adjacent fragments in this cycle  $f_i$  and  $f_j$  such that  $i < j$  and they share the  $k^{\text{th}}$  SNP. As we iterate through fragments of the cycle, we call the allele that will be paired with the next fragment the active allele. If  $(s_k, s_{k+1}) < 0$  then  $f_{j,k+1} = f_{i,k}$ , that is, the active allele that will pair with  $f_{j+1}$  is the same allele as  $f_{i,k}$ . However, if  $(s_k, s_{k+1}) > 0$  then  $f_{j,k+1} \neq f_{i,k}$ , and the active allele that will pair with  $f_{j+1}$  will be the opposite allele as  $f_{i,k}$ . Thus negative edges in  $G_C$  do not change the active allele while positive edges in  $G_C$  flip the active allele from 0 to 1 (or vice-versa).

Case (1):  $k$  even. The  $v_1, \dots, v_{k-1}$  subset either has an even or odd number of negative pairwise phase relationships. Case 1.a: Even number of negative pairwise phase relationships; odd number of positive pairwise phase relationships. The active allele of  $v_{k-1}$  is the same as the active allele of  $v_1$  therefore  $v_k$  must be induce a positive pairwise phase relationship. Case 1.b: Odd number of negative pairwise phase relationships; even number of positive pairwise phase relationships. The active allele of  $v_{k-1}$  is different from the active allele of  $v_1$  therefore  $v_k$  must be induce a negative pairwise phase relationship. In both cases 1.a and 1.b the total number of negative edges is even.

Case(2):  $k$  is odd. Case 2.a: Even number of negative pairwise phase relationships; even number of positive pairwise phase relationships. The active allele of  $v_{k-1}$  is different from the active allele of  $v_1$  therefore  $v_k$  must be induce a negative pairwise phase relationship. Case 2.b: Odd number of negative pairwise phase relationships; odd number of positive pairwise phase relationships. The active allele of  $v_{k-1}$  is the same as the active allele of  $v_1$  therefore  $v_k$  must be induce a positive pairwise phase relationship. In both cases 2.a and 2.b the total number of negative edges is odd.

### 2 MWVR Proof

Theorem: MWVR is NP-hard.

**Proof 2** The reduction is from the problem of removing the minimum number of edges of a graph to make it bipartite. Let  $G$  be an arbitrary graph and  $M$  the SNP-fragment matrix as defined in Lemma 1 which encodes the fragment conflict graph  $G_F = G$ .  $G_F$  may contain a number of cycles of odd length which produce conflicting cycles in the compass graph  $G_C$  by Lemma 2. Each vertex in  $G_C$  corresponds to an edge in  $G_F$  by Lemma 1. The vertex set solution to the MVR optimization  $L$  yields the minimum number of vertices required to remove all of the conflicting cycles in  $G_C$ . Because a graph is bipartite if and only if it contains no odd length cycles and  $G_C$  is the line graph of  $G_F$ , the removal of these vertices corresponds to removal of edges; the minimum of which makes  $G_F$  bipartite.

### 3 Pacific Biosciences run times

|                  | HapCompass MWER | HapCompass MEC | HapCUT | Levy |
|------------------|-----------------|----------------|--------|------|
| avg. time (s)    | 10              | 10.8           | 13.6   | 19.3 |
| avg. memory (MB) | 1251            | 1489           | 43.2   | 1049 |

Table 1: Average resource requirements for PacBio haplotype assembly runs. The HapCompass software is not optimized for minimal memory usage which is exemplified in the memory requirement results of the Levy *et al.* (2007) algorithm. This algorithm is implemented within the HapCompass software and should have a very small fingerprint but requires about a gigabyte of memory. Reducing the input fragment set into a secondary format prior to haplotype assembly (HapCUT does this) reduces our memory footprint by a factor of 10-100 times.

### 4 1000 Genomes Project Results

| Chr | MWER        |             |             | MEC   |      |      | Levy        |      |      | HapCUT |             |             |
|-----|-------------|-------------|-------------|-------|------|------|-------------|------|------|--------|-------------|-------------|
|     | FMPR        | BFM         | MEC         | FMPR  | BFM  | MEC  | FMPR        | BFM  | MEC  | FMPR   | BFM         | MEC         |
| 1   | <b>3421</b> | <b>2348</b> | <b>2371</b> | 3681  | 2519 | 2545 | 3619        | 2594 | 2632 | 3520   | 2423        | 2441        |
| 2   | <b>4891</b> | <b>2930</b> | <b>2996</b> | 5193  | 3081 | 3166 | 5154        | 3175 | 3273 | 5140   | 3022        | 3072        |
| 3   | <b>3696</b> | <b>2394</b> | <b>2449</b> | 4014  | 2585 | 2629 | 3823        | 2643 | 2703 | 3789   | 2476        | 2511        |
| 4   | <b>4846</b> | <b>2710</b> | <b>2777</b> | 5136  | 2906 | 2976 | 4891        | 2899 | 2974 | 4971   | 2805        | 2846        |
| 5   | <b>3569</b> | <b>2245</b> | <b>2265</b> | 3847  | 2428 | 2451 | 3851        | 2581 | 2606 | 3650   | 2290        | 2299        |
| 6   | 10425       | <b>3603</b> | 4032        | 10944 | 3846 | 4265 | <b>9468</b> | 3700 | 4075 | 10597  | 3630        | <b>4030</b> |
| 7   | <b>3512</b> | <b>2138</b> | <b>2173</b> | 3768  | 2288 | 2330 | 3677        | 2358 | 2407 | 3621   | 2214        | 2238        |
| 8   | <b>2894</b> | <b>1864</b> | <b>1891</b> | 3142  | 1999 | 2029 | 3048        | 2084 | 2118 | 2979   | 1947        | 1951        |
| 9   | 2844        | <b>1551</b> | <b>1572</b> | 3039  | 1667 | 1689 | <b>2737</b> | 1655 | 1687 | 2884   | 1580        | 1591        |
| 10  | <b>2743</b> | <b>1857</b> | <b>1875</b> | 2952  | 1981 | 2001 | 2838        | 2027 | 2048 | 2836   | 1932        | 1940        |
| 11  | 2662        | <b>1634</b> | <b>1650</b> | 2837  | 1727 | 1749 | <b>2643</b> | 1739 | 1778 | 2728   | 1694        | 1693        |
| 12  | <b>2620</b> | <b>1627</b> | <b>1657</b> | 2833  | 1784 | 1811 | 2786        | 1819 | 1856 | 2676   | 1678        | 1687        |
| 13  | 2503        | <b>1461</b> | <b>1477</b> | 2625  | 1554 | 1573 | <b>2473</b> | 1558 | 1576 | 2548   | 1490        | 1501        |
| 14  | <b>1442</b> | <b>1020</b> | <b>1027</b> | 1525  | 1070 | 1079 | 1512        | 1094 | 1102 | 1471   | 1045        | 1044        |
| 15  | <b>1635</b> | <b>1085</b> | <b>1097</b> | 1786  | 1168 | 1189 | 1757        | 1254 | 1272 | 1696   | 1133        | 1142        |
| 16  | <b>2158</b> | <b>1308</b> | <b>1344</b> | 2297  | 1410 | 1435 | 2198        | 1405 | 1458 | 2205   | 1333        | 1368        |
| 17  | 2797        | 1219        | 1320        | 3099  | 1354 | 1460 | <b>2493</b> | 1230 | 1305 | 2788   | <b>1216</b> | <b>1299</b> |
| 18  | <b>1457</b> | <b>982</b>  | <b>985</b>  | 1629  | 1088 | 1094 | 1563        | 1118 | 1130 | 1490   | 1013        | 1009        |
| 19  | <b>1292</b> | <b>803</b>  | <b>815</b>  | 1404  | 865  | 879  | 1369        | 901  | 918  | 1324   | 816         | 826         |
| 20  | <b>1169</b> | <b>808</b>  | <b>817</b>  | 1247  | 859  | 866  | 1279        | 924  | 939  | 1210   | 846         | 847         |
| 21  | <b>871</b>  | <b>545</b>  | <b>558</b>  | 916   | 581  | 588  | 912         | 589  | 601  | 901    | 563         | 574         |
| 22  | <b>681</b>  | <b>446</b>  | <b>449</b>  | 709   | 461  | 465  | 698         | 485  | 488  | 700    | 460         | 463         |

Table 2: Results of the NA12878 1000 Genomes Project 454 haplotype assemblies for chromosomes (chr) 1-22 and algorithms HapCompass MWER, HapCompass MEC, Levy *et al.* (2007), and HapCUT.

### References

Levy, S., Sutton, G., *et al.* (2007). The diploid genome sequence of an individual human. *PLoS biology*, **5**(10), e254.
